# Supplementary material
Source: HighWire-hosted journal article supplement (https://bmjopen.bmj.com/content/12/7/e060991)
Supplement: inline-supplementary-material-1 [file inline-supplementary-material-1.pdf]

## Schwill et al: Stopping the haemorrhage of surgical competencies in General Practice

**Figure 1**

| Blueprint: A compact intervention for General Practice Trainees aiming at the improvement of competencies in minor surgery |                                                                                                              |                                                                                                                                                                                                                                                                                               |                                                                                                                                                                                              |                                                                                                                |
|----------------------------------------------------------------------------------------------------------------------------|--------------------------------------------------------------------------------------------------------------|-----------------------------------------------------------------------------------------------------------------------------------------------------------------------------------------------------------------------------------------------------------------------------------------------|----------------------------------------------------------------------------------------------------------------------------------------------------------------------------------------------|----------------------------------------------------------------------------------------------------------------|
| Schedule                                                                                                                   | Step                                                                                                         | Aim                                                                                                                                                                                                                                                                                           | Methods                                                                                                                                                                                      | Tools and material                                                                                             |
| <b>Pre-interventional survey</b>                                                                                           |                                                                                                              |                                                                                                                                                                                                                                                                                               |                                                                                                                                                                                              |                                                                                                                |
| 90 min.                                                                                                                    | <b>Minor surgery in General Practice – part 1</b><br><br>“I have fallen down the stairs / I have cut myself” | Introduction, reflection on personal level of competence<br><br>Knowledge and how to do it: common algorithms on how to proceed with different consultations in general practice (e.g. fall, contusion, fracture, acute wounds, bites, foreign bodies), red flags as well as watchful waiting | Group discussion on previous knowledge and experience, lecture, case-based plenal discussions, group-work on cases                                                                           | Survey on previous skills, presentation, chart request, print-out of cases /work sheets                        |
| 30 min.                                                                                                                    | <b>Coffee break</b>                                                                                          |                                                                                                                                                                                                                                                                                               |                                                                                                                                                                                              |                                                                                                                |
| 90 min.                                                                                                                    | <b>Minor surgery in General Practice – part 2</b>                                                            | Procedural skills in bodycheck after fall, suturing and bandaging<br><br><br><br><br><br><br><br>Awareness, knowledge and procedural understanding for domestic violence                                                                                                                      | Assessment of previous skills, practical exercise with exemplary body check, bandaging and suturing (suturing, bandaging extremities on each other)<br><br>Plenary lecture, Group discussion | Pig-feet, sewing-materials, bandage, presentation, print-out of cases<br><br><br><br>Presentation, work sheets |
| 60 min.                                                                                                                    | <b>Lunch break</b>                                                                                           |                                                                                                                                                                                                                                                                                               |                                                                                                                                                                                              |                                                                                                                |
| 90 min.                                                                                                                    | <b>Minor surgery in General Practice – part 3</b>                                                            | Synthesis of comprehensive treatment (including vaccination, referral to surgeon / hospital, further consultations)<br><br>Self-reflection on how to proceed on increasing competencies in minor surgery                                                                                      | Plenary lecture, Group discussion<br><br>Case-based discussions<br><br>Discussion on how to implement minor surgery into daily practice                                                      | Presentation, work sheets, flipchart                                                                           |

**Note.** GP = General Practice
